# Supplementary material
Source: Royal Society of Chemistry journal article supplement (doi:10.1039/d6ta00617e)
Supplement: d6ta00617e3.pdf [file d6ta00617e3.pdf]

## Supporting Information

### Ion-Pair and Solvation Engineering for High-Potential Organic Catholytes in Aqueous Flow Batteries

Wenxuan Fu, Puiki Leung\*, Shuai Liu, Yong Zuo, Tadele H. Wondimu, Akeel A. Shah, Frank C. Walsh, Qian Xu\*, Qiang Liao

**Table S1.** Benchmarking comparison of representative AORFB catholytes in terms of redox potential, solubility, decay rate, theoretical energy density, and estimated material cost. Note: Estimated material costs are approximate laboratory-scale prices obtained from commercial suppliers or structurally similar prototype compounds. System-level costs (\$ kWh<sup>-1</sup>) depend strongly on full-cell configuration and operating conditions and are therefore not directly compared here.

| Catholyte                                                                | Redox Potential (V vs. SHE) | Solubility (M) | Decay Rate (%/cycle) | Theoretical Energy Density (Wh L <sup>-1</sup> , catholyte only) | Estimated material cost (\$ kg <sup>-1</sup> ) | Notes / Ref                                                   |
|--------------------------------------------------------------------------|-----------------------------|----------------|----------------------|------------------------------------------------------------------|------------------------------------------------|---------------------------------------------------------------|
| <b>4-NPEA·HBr (this work)</b>                                            | <b>1.24</b>                 | <b>&gt;0.7</b> | <b>&lt;0.085</b>     | <b>~62 (0.7 M, 4e<sup>-</sup>)</b>                               | <b>~143</b>                                    | <b>Br<sup>-</sup> SSIP for transport, 4e<sup>-</sup> PCET</b> |
| QCA (quinoxaline anolyte, paired to K <sub>4</sub> Fe(CN) <sub>6</sub> ) | -0.79                       | 5.5            | 0.1                  | -                                                                | ~3400                                          | High solubility anolyte for 1.28 V cell [1]                   |
| Viologen (halide)                                                        | 0.8–1.0                     | 1.0            | 0.05                 | 40–50 (2e <sup>-</sup> )                                         | ~6×10 <sup>4</sup>                             | Halide reduces dimerization [2]                               |
| Phenazine (halide)                                                       | 0.9–1.05                    | 0.6–0.9        | ~0.2                 | 30–40 (2e <sup>-</sup> )                                         | ~500 – 2000                                    | Halide improves solubility [3]                                |
| Tri-TEMPO (non-aq.)                                                      | 0.57                        | 0.5            | 0.19                 | ~24 (0.5 M, 3e <sup>-</sup> )                                    | ~3×10 <sup>4</sup>                             | Multi-electron TEMPO catholyte for non-aqueous RFB [4]        |
| 1,6-DPAP (phenazine anolyte)                                             | -0.08                       | 1.0            | -                    | ~4 (1 M, 2e <sup>-</sup> )                                       | ~500 – 2000                                    | Low cost anolyte [5]                                          |
| Ferrocene (FcN <sub>2</sub> Br <sub>2</sub> )                            | 0.61                        | 1.0            | 0.2                  | ~16 (1e <sup>-</sup> )                                           | ~500 – 2000                                    | Halide for solubility [6]                                     |
| Na <sub>4</sub> [FeII(Dcbpy) <sub>2</sub> (CN) <sub>2</sub> ]            | 0.85                        | 1.0            | <0.1                 | ~23                                                              | ~1000 – 5000                                   | Fe-bipyridine coordination catholyte [7]                      |
| Vanadium (inorganic catholyte)                                           | 1.0                         | 1.6            | <0.1                 | 20–35                                                            | ~100                                           | Benchmark inorganic catholyte [8]                             |

Note: Estimated material costs are based on commercially available laboratory-scale reagent prices or representative precursor costs reported in the literature, rather than bulk industrial production costs. In particular, the ~143 \$ kg<sup>-1</sup> value for 4-NPEA·HBr is derived from laboratory-scale commercial pricing and does not represent large-scale industrial production cost. These values are provided for qualitative comparison of relative economic feasibility.

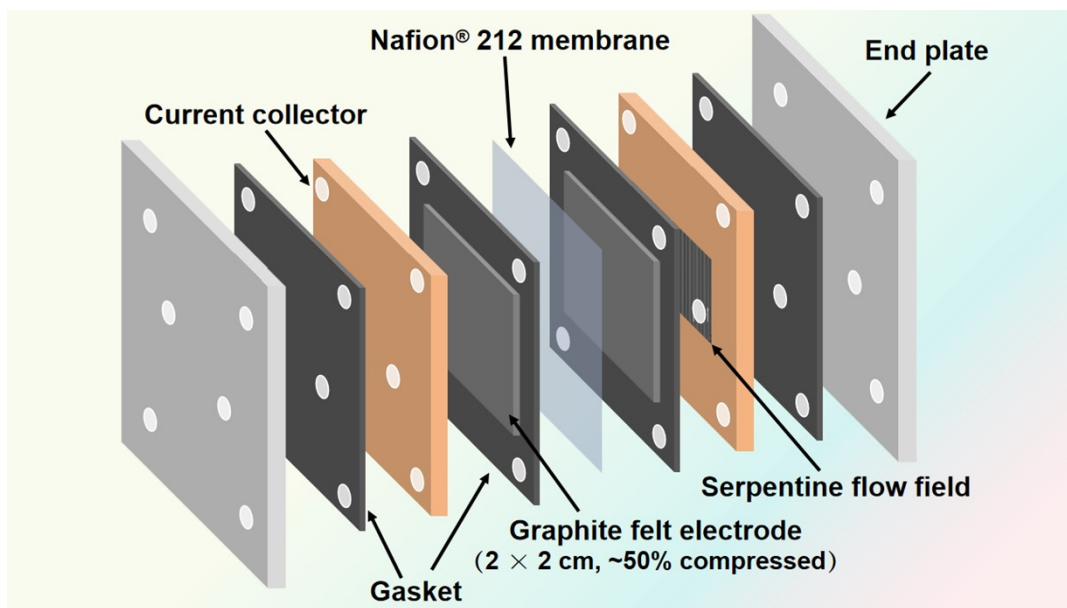

**Figure S1.** Exploded schematic of the single-cell flow battery assembly used in this study. The components include end plates, current collector with serpentine flow field, PTFE gasket (1 mm thick), heat-treated graphite felt electrode ( $2 \times 2$  cm,  $\sim 50\%$  compressed), Nafion<sup>®</sup> 212 membrane. The active geometric area is  $4 \text{ cm}^2$  and electrolytes are circulated at  $50 \text{ mL min}^{-1}$ .

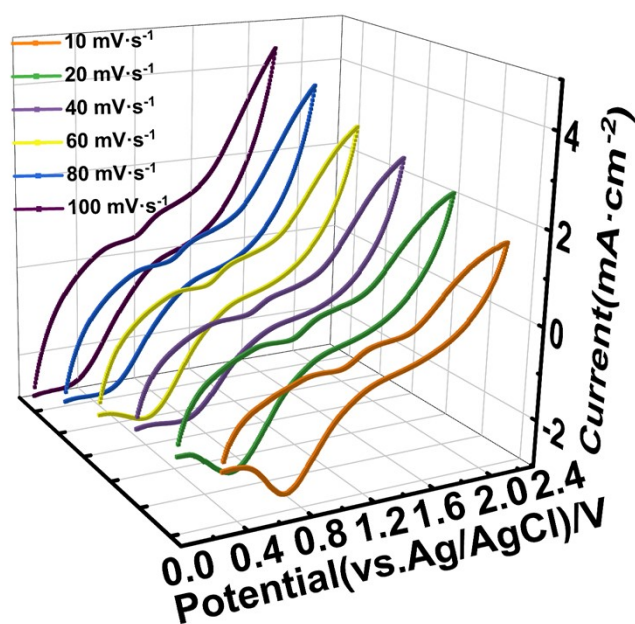

**Figure S2.** CV curves of 0.1 M 4-NPEA·HBr in 1 M HCl at different scan rates (10–100  $\text{mV s}^{-1}$ ) on thermally treated graphite felt electrode.

**Table S2.** Key parameters used in the numerical simulation model.

| Symbols                   | Parameters                                    | Value                 | Unit                            |
|---------------------------|-----------------------------------------------|-----------------------|---------------------------------|
| $N_{\text{mesh}}$         | Number of elements                            | 55895                 | –                               |
| $c_{\text{pos}}^0$        | Initial concentration of<br><i>4-NPEA·HBr</i> | 100                   | $\text{mol}\cdot\text{m}^{-3}$  |
| $c_{\text{Cl}}^0$         | Initial concentration of $\text{Cl}^-$        | 1000                  | $\text{mol}\cdot\text{m}^{-3}$  |
| $D_{\text{pos}}$          | Diffusion coefficient of<br><i>4-NPEA·HBr</i> | $1.32\times 10^{-9}$  | $\text{m}^2\cdot\text{s}^{-1}$  |
| $E_{\text{pos}}^0$        | Equilibrium potential: positive               | 1.035                 | V                               |
| $\sigma_{\text{sGF}}$     | GF conductivity                               | 220                   | $\text{S}\cdot\text{m}^{-1}$    |
| $\sigma_{\text{m}}$       | Membrane conductivity                         | 0.3                   | $\text{S}\cdot\text{m}^{-1}$    |
| $\sigma_{\text{pos}}$     | Conductivity of positive<br>electrolyte       | 38                    | $\text{S}\cdot\text{m}^{-1}$    |
| T                         | Temperature                                   | 298.15                | K                               |
| $i_{\text{app}}$          | Applied current density                       | –                     | $\text{A}\cdot\text{m}^{-2}$    |
| $d_{\text{fGF}}$          | Carbon fiber diameter                         | $1.5 \times 10^{-5}$  | m                               |
| $k_{\text{posGF}}$        | Reaction rate constant of positive            | $6.25 \times 10^{-5}$ | $\text{m}\cdot\text{s}^{-1}$    |
| $\alpha_{\text{lGF}}$     | transfer coefficient of positive              | 0.424                 | –                               |
| $K_{\text{CK}}$           | Carman–Kozeny constant                        | 5.55                  | –                               |
| $\varepsilon_{\text{GF}}$ | Electrode porosity                            | 0.95                  | –                               |
| $a_{\text{GF}}$           | Specific surface area of GF                   | 673272                | $\text{m}^{-1}$                 |
| F                         | Faraday constant                              | 96485                 | $\text{C}\cdot\text{mol}^{-1}$  |
| Q                         | Volumetric flow rate                          | 50                    | $\text{mL}\cdot\text{min}^{-1}$ |
| $W_{\text{e}}$            | Width of electrode                            | 0.02                  | m                               |

|      |                     |                    |   |
|------|---------------------|--------------------|---|
| H_e  | Height of electrode | 0.02               | m |
| L_GF | Electrode thickness | 0.002              | m |
| L_M  | Membrane thickness  | $7 \times 10^{-4}$ | m |

**Table S3.**  $i_{pc}/i_{pa}$  ratios at different scan rates.

| Scan rate (mV s <sup>-1</sup> ) | $i_{pa}$ (mA cm <sup>-2</sup> ) | $i_{pc}$ (mA cm <sup>-2</sup> ) | $i_{pc}/i_{pa}$ |
|---------------------------------|---------------------------------|---------------------------------|-----------------|
| 10                              | 128                             | -83                             | 0.65            |
| 20                              | 295                             | -305                            | 1.03            |
| 40                              | 391                             | -443                            | 1.13            |
| 60                              | 461                             | -530                            | 1.14            |
| 80                              | 532                             | -559                            | 1.05            |
| 100                             | 600                             | -591                            | 0.99            |

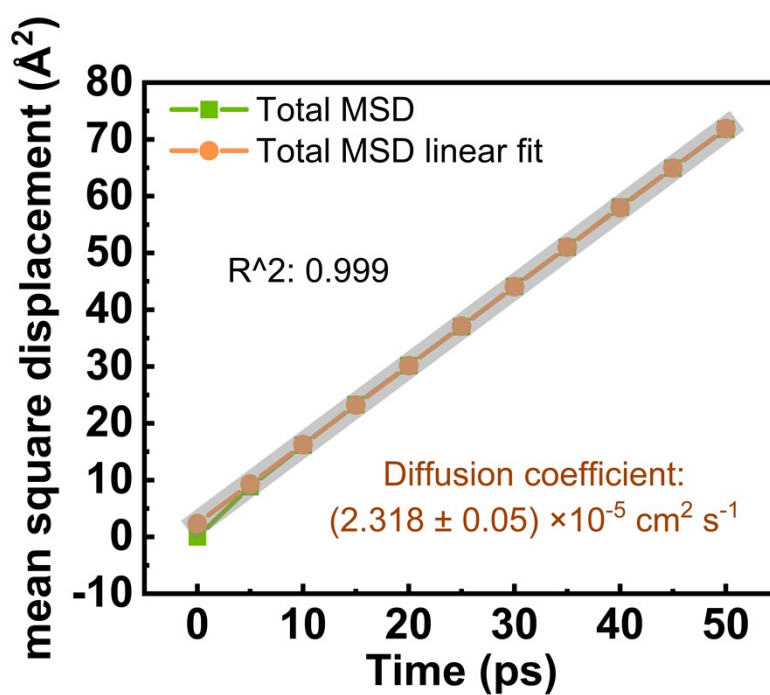

**Figure S3.** The mean square displacement curve of 4-NPEA·HBr, The shaded region represents the statistical uncertainty obtained from trajectory sampling.

**Table S4.** Comparison of diffusion coefficients from CV (using different assumed n) and MD simulation.

| Assumed n | D from CV ( $\text{cm}^2 \text{s}^{-1}$ ) | Deviation factor from MD ( $2.32 \times 10^{-5} \text{cm}^2 \text{s}^{-1}$ ) | Consistency      |
|-----------|-------------------------------------------|------------------------------------------------------------------------------|------------------|
| 1         | $\sim 8.45 \times 10^{-4}$                | $\sim 36 \times$ higher (unrealistic)                                        | Poor             |
| 2         | $\sim 1.06 \times 10^{-4}$                | $\sim 4.6 \times$ higher                                                     | Inconsistent     |
| <b>4</b>  | <b><math>1.32 \times 10^{-5}</math></b>   | <b><math>\sim 1.76 \times</math> lower</b>                                   | <b>Excellent</b> |
| 6         | $\sim 3.9 \times 10^{-6}$                 | $\sim 6 \times$ lower                                                        | Unrealistic      |

**Table S5.** Summary of density functional theory calculation data.

| Compound   | DFT Optimization Parameters |                |        | Solvation Free Energy (PCM, Water) |               |
|------------|-----------------------------|----------------|--------|------------------------------------|---------------|
|            | E(OPT) (a.u.)               | Conv. Criteria | -V/T   | $\Delta G(\text{solv})$ (kcal/mol) | E(PCM) (a.u.) |
| 4-NPEA·HBr | -3142.911                   | 0.19D-08       | 2.0067 | -21.42                             | -3143.148     |
| 4-HPEA·HBr | -3069.108                   | 0.94D-08       | 2.0068 | -24.88                             | -3069.169     |

### S3.2.1. Density Functional Theory (DFT) Analysis of Electronic Structure

For the oxidized state, exhibits a LUMO energy level of  $-2.91$  eV, which is more negative than those of common organic positive materials (e.g. quinones, LUMO  $\approx -1.5$  to  $-2.0$  eV), indicating stronger electron affinity and suggesting a higher reduction potential. The LUMO electron density is highly localized on the nitro group ( $-\text{NO}_2$ )

and the attached benzene ring, confirming the nitro group as the primary reduction active center. The conjugated benzene ring facilitates electron delocalization, further enhancing reaction kinetics. The HOMO level ( $-6.34$  eV) lies above the OER threshold, ensuring antioxidative stability. This stability suppresses the OER, which is essential for achieving high-potential aqueous batteries. The HOMO-LUMO gap ( $\Delta E$ ) of  $3.43$  eV indicates the molecular stability and feasibility of redox reactions, consistent with the reversible electrochemical behavior observed.

In the reduced state, 4-HPEA·HBr shows a higher HOMO energy level ( $-5.93$  eV), suggesting that the hydroxylamine group is more readily oxidized back to the nitro group during charging. The HOMO electron density is primarily localized on the lone pair electrons of the hydroxylamine group, confirming it as the electron-donating center (oxidation active site), consistent with the high reversibility observed in electrochemical tests. Furthermore, the HOMO density extends partially to the Br<sup>-</sup> ion and the benzene ring, indicating that Br<sup>-</sup> stabilizes the reduced structure through coordination. The HOMO density partially delocalized onto Br<sup>-</sup> suggests through-space electronic coupling, potentially aided by the conjugated ring. The relatively high LUMO energy level ( $-1.00$  eV) indicates weaker electron affinity, which helps prevent irreversible side reactions caused by over-reduction, thereby enhancing cycling stability. And the larger  $\Delta E$  ( $4.88$  eV) indicates higher kinetic stability in the reduced state.

Solvation free energy calculations reveal  $\Delta G_{(\text{solv})}$  values of  $-21.42$  kcal/mol for 4-NPEA·HBr and  $-24.88$  kcal/mol for 4-HPEA·HBr, confirming the thermodynamic stability of both states and supporting the stabilization of the reduced state by Br<sup>-</sup> coordination ( $\Delta\Delta G_{(\text{solv})} = -3.46$  kcal/mol). The elevated HOMO level of 4-HPEA·HBr, along with the stabilizing effect of the Br<sup>-</sup> ion interaction, reinforces the thermodynamic spontaneity of the hydroxylamine oxidation to nitro, contributing to the observed cycling stability and slow capacity decay.

When comparing the impact of different anions, 4-NPEA·HBr and 4-NPEA·HCl exhibit similar LUMO energy levels and nearly identical electron density distribution patterns. However, the HOMO energy level of 4-NPEA·HCl is markedly lower ( $-7.78$

eV), with electron density extensively delocalized over the Cl<sup>-</sup> ion, the benzene ring, and the amine group. This extensive hybridization results from the small radius, high electronegativity and low polarizability of Cl<sup>-</sup>, favoring strong electrostatic ionic bonding interactions with the organic cation.

### S3.2.2. MD Simulations of Diffusion and Solvation

RDF analysis (**Figure 3d** and **Table S6**) revealed fundamental differences in the interactions of Br<sup>-</sup> and Cl<sup>-</sup> with the nitro group oxygen atoms (O<sub>nitro</sub>). For 4-NPEA·HBr (Br-O<sub>nitro</sub>), the first RDF peak position at *ca.* 5.45 Å indicates a solvent-separated ion pair (SSIP) configuration, mediated by water molecule bridging. The corresponding *g(r)* peak value of  $\approx 7.0$  indicates a high probability of finding the Br<sup>-</sup> ion at this specific distance from O<sub>nitro</sub>, reflecting a strong spatial correlation between them in the solution. In contrast, for 4-NPEA·HCl (Cl-O<sub>nitro</sub>), the first RDF peak at *ca.* 3.65 Å (*g(r)*  $\approx 1.2$ ) is characteristic of a contact ion pair (CIP) configuration, where direct electrostatic interaction occurs. The coordination number (CN), obtained by integrating the RDF up to 7.0 Å, provides complementary insight into the local association behavior. The CN value for Cl-O<sub>nitro</sub> (CN@7.0 Å  $\approx 0.13$ ) is higher than that for Br-O<sub>nitro</sub> (CN@7.0 Å  $\approx 0.053$ ), indicating a higher probability of direct and frequent ion-dipole contact in the Cl<sup>-</sup> system, consistent with the formation of a CIP. In contrast, the lower CN observed for Br<sup>-</sup> does not imply weaker interaction, but rather reflects the SSIP configuration, where Br<sup>-</sup> is predominantly separated from O<sub>nitro</sub> by one or more intervening water molecules. In this case, the interaction is characterized by a well-defined spatial correlation, as evidenced by the pronounced RDF peak at  $\sim 5.45$  Å with a high *g(r)* value ( $\sim 7.0$ ), while the reduced CN reflects the transient and indirect nature of Br<sup>-</sup> coordination. Although quantitative prediction of viscosity and conductivity is beyond the primary scope of this MD study, The solvent-separated ion-pair configuration observed in the Br<sup>-</sup> system is expected to reduce ion clustering and facilitate molecular mobility, consistent with literature models for ion-paired organic electrolytes.<sup>[9]</sup>

**Table S6.** Summary table of Radial distribution Function Results.

| Parameters                     | Br-O <sub>nitro</sub>           | Cl-O <sub>nitro</sub>       | Multiple of difference |
|--------------------------------|---------------------------------|-----------------------------|------------------------|
| The position of the first peak | $5.45 \pm 0.05 \text{ \AA}$     | $3.65 \pm 0.05 \text{ \AA}$ | ~1.49 times            |
| The height of the first peak   | $7.0 \pm 0.2$                   | $1.2 \pm 0.1$               | ~5.83 times            |
| Coordination number            | $0.053 \pm 0.005$               | $0.13 \pm 0.01$             | ~0.41 times            |
| Interaction type               | Solvent separation of ion pairs | Contact ion pair            | —                      |

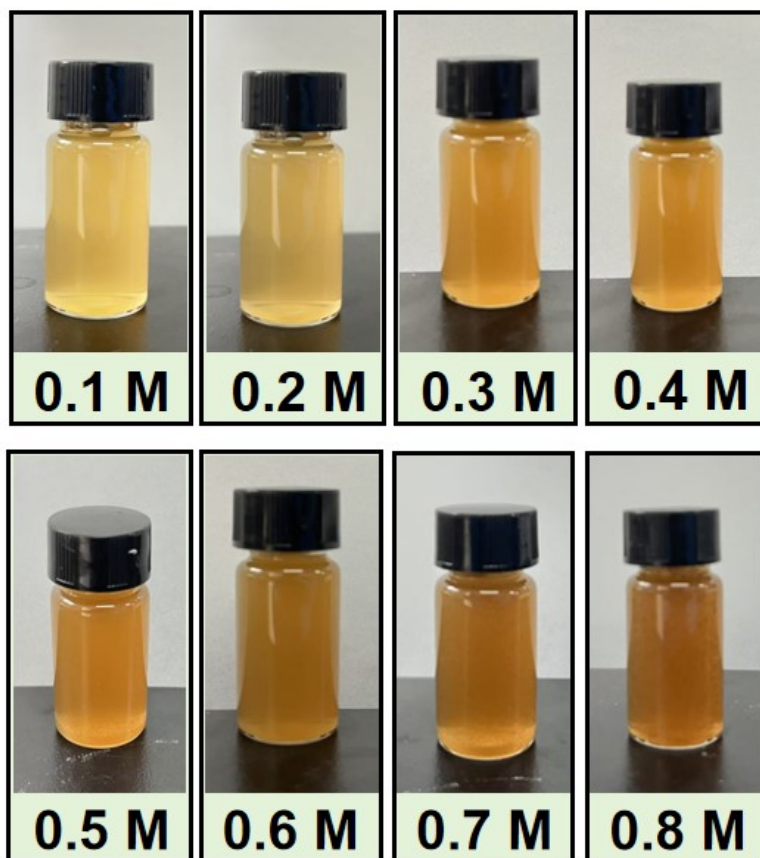

Figure S4. Test of the solubility of 4-NPEA · HBr in 1 M HCl.

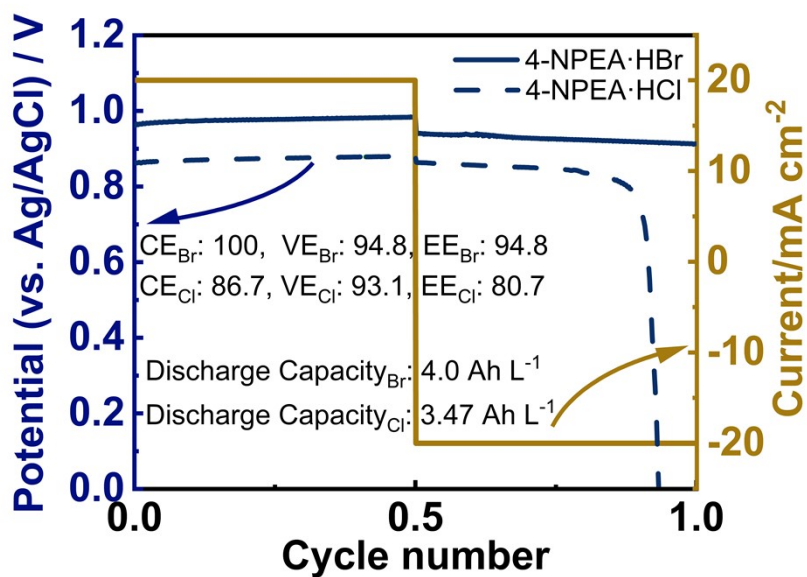

Figure S5. Charge-discharge profiles of 4-NPEA·HBr and 4-NPEA·HCl.

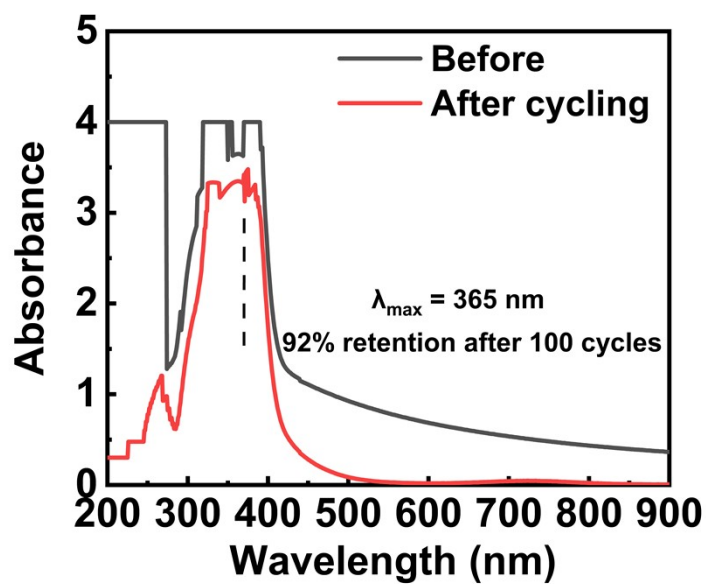

Figure S6. UV-vis spectra of the catholyte before and after cycling.

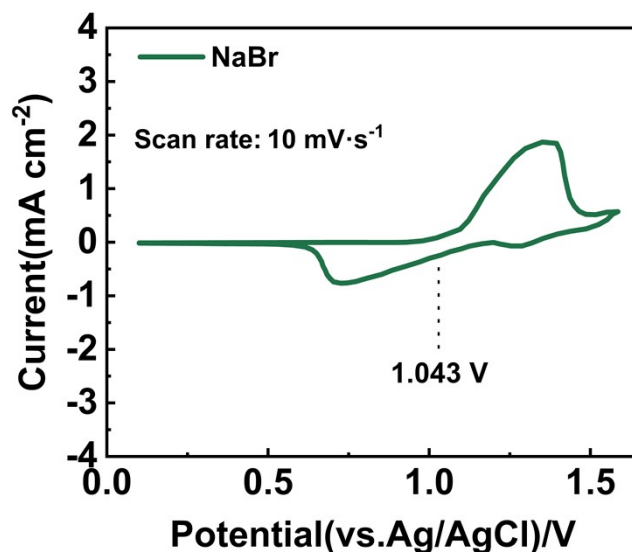

**Figure S7.** Cyclic voltammogram of 0.1 M NaBr in 1 M HCl (no 4-NPEA·HBr) on thermally treated graphite felt electrode (scan rate  $10 \text{ mV s}^{-1}$ ). The anodic current density remains negligible ( $< 0.3 \text{ mA cm}^{-2}$ ) up to approximately 1.1 V vs. Ag/AgCl (corresponding to  $\sim 1.3 \text{ V}$  vs. SHE), with the oxidation peak appearing at higher potentials. This demonstrates a substantial kinetic overpotential for  $\text{Br}^-/\text{Br}_2$  oxidation, confirming bromide remains electrochemically inactive in the catholyte operating window ( $\sim 1.24 \text{ V}$  vs. SHE). Dashed line marks the equivalent operating potential (1.043 V vs. Ag/AgCl, corresponding to 1.24 V vs. SHE).

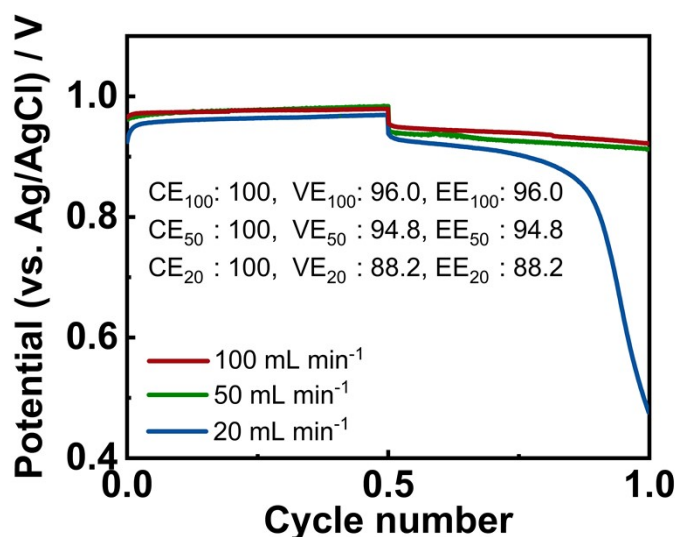

**Figure S8.** Charge-discharge voltage profiles of the 4-NPEA·HBr flow cell at different electrolyte flow rates (20, 50, and  $100 \text{ mL min}^{-1}$ ).

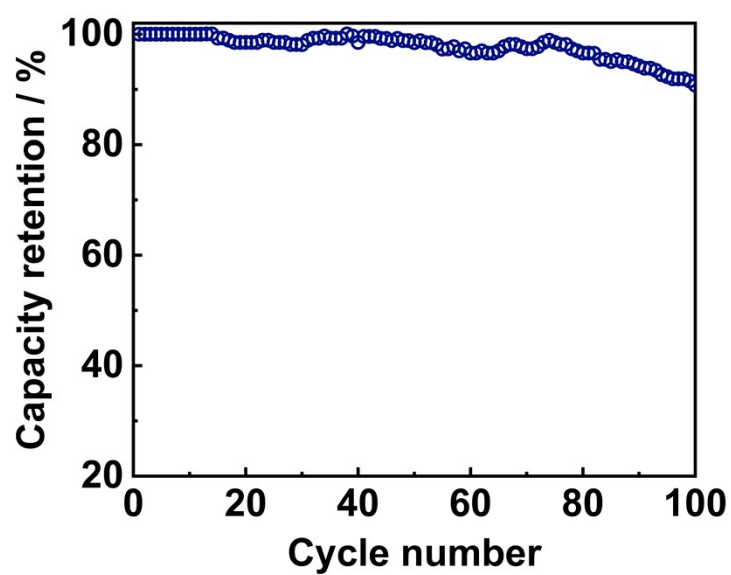

**Figure S9.** Capacity retention of the 4-NPEA·HBr electrolyte during 100 galvanostatic charge–discharge cycles.

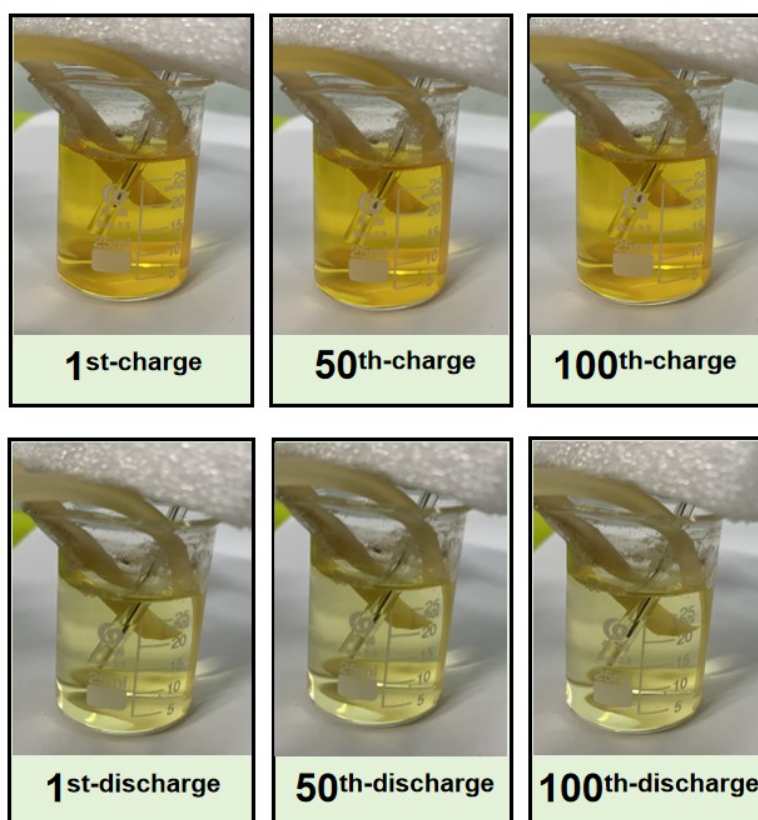

**Figure S10.** Reversible electrolyte color evolution with SOC during long-term cycling.

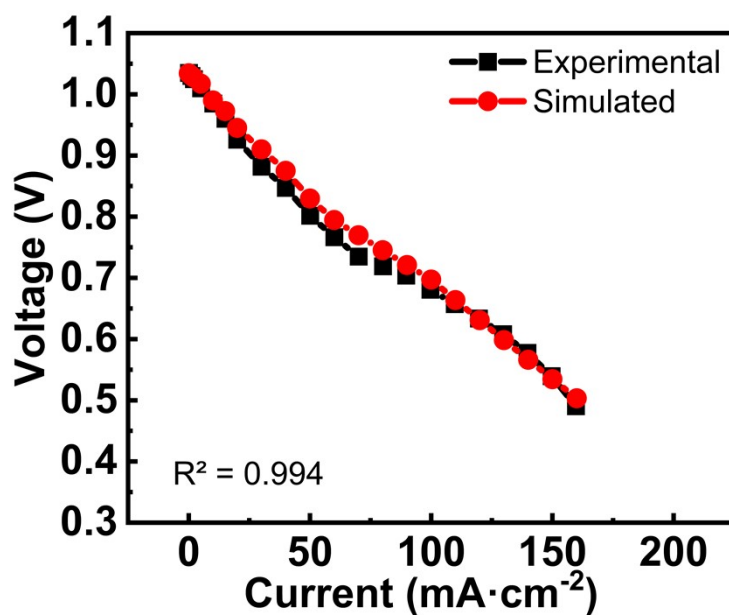

**Figure S11.** Comparison of simulated and experimental values of the 4-NPEA·HBr.

**Table S7.** Grid independence of voltage and pressure drop.

| Number of grids | Pressure drop (Pa) | Output voltage (V) |
|-----------------|--------------------|--------------------|
| 40781           | 2621.9             | 1.0414             |
| 44196           | 2630.3             | 1.0412             |
| 48369           | 2631.0             | 1.0411             |
| 51051           | 2642.8             | 1.0410             |
| 53778           | 2660.7             | 1.0410             |
| 55895           | 2662.2             | 1.0410             |

Raw electrochemical data for the CV curves are provided in **Dataset S1**.

The raw UV–vis spectral data used to generate **Figure S6** are provided in **Dataset S2** in the Supporting Information.

## References (Supporting Information)

- 1 C. Wang, Y. Wang, M. Tao, B. Yu, K. Zhang, J. Wei, Y. Liu, P. Zhang, G. Ding, Z. Tie, J. Cao, and Z. Jin, C. Wang, Y. Wang, M. Tao, B. Yu, K. Zhang, J. Wei, Y. Liu, P. Zhang, G. Ding, Z. Tie, J. Cao, and Z. Jin, *ACS Appl. Energy Mater.*, 2022, **5**, 10379-10384;
- 2 T. Yin, J. Duanmu, and L. Liu, T. Yin, J. Duanmu, and L. Liu, *J. Mater. Chem. A*, 2024, **12**, 15519-15540;
- 3 C. Ye, A. Wang, C. Breakwell, R. Tan, C. Grazia Bezzu, E. Hunter-Sellars, D. R. Williams, N. P. Brandon, P. A. A. Klusener, A. R. Kucernak, K. E. Jelfs, N. B. McKeown, and Q. Song, C. Ye, A. Wang, C. Breakwell, R. Tan, C. Grazia Bezzu, E. Hunter-Sellars, D. R. Williams, N. P. Brandon, P. A. A. Klusener, A. R. Kucernak, K. E. Jelfs, N. B. McKeown, and Q. Song, *Nat. Commun.*, 2022, **13**, 3184;
- 4 R. K. Gautam, X. Wang, A. Lashgari, S. Sinha, J. McGrath, and R. S. J. J. Jiang, R. K. Gautam, X. Wang, A. Lashgari, S. Sinha, J. McGrath, and R. S. J. J. Jiang, *Nat Commun*, 2023, **14**, 4753;
- 5 D. Emmel, S. Kunz, N. Blume, Y. Kwon, T. Turek, C. Minke, and D. Schroder, D. Emmel, S. Kunz, N. Blume, Y. Kwon, T. Turek, C. Minke, and D. Schroder, *Nat Commun*, 2023, **14**, 6672;
- 6 B. Hu, C. DeBruler, Z. Rhodes, and T. L. Liu, B. Hu, C. DeBruler, Z. Rhodes, and T. L. Liu, *J. Am. Chem. Soc.*, 2017, **139**, 1207-1214;
- 7 X. Li, P. Gao, Y.-Y. Lai, J. D. Bazak, A. Hollas, H.-Y. Lin, V. Murugesan, S. Zhang, C.-F. Cheng, W.-Y. Tung, Y.-T. Lai, R. Feng, J. Wang, C.-L. Wang, W. Wang, and Y. Zhu, X. Li, P. Gao, Y.-Y. Lai, J. D. Bazak, A. Hollas, H.-Y. Lin, V. Murugesan, S. Zhang, C.-F. Cheng, W.-Y. Tung, Y.-T. Lai, R. Feng, J. Wang, C.-L. Wang, W. Wang, and Y. Zhu, *Nat. Energy*, 2021, **6**, 873-881;
- 8 P. Leung, A. A. Shah, L. Sanz, C. Flox, J. R. Morante, Q. Xu, M. R. Mohamed, C. Ponce de León, and F. C. Walsh, P. Leung, A. A. Shah, L. Sanz, C. Flox, J. R. Morante, Q. Xu, M. R. Mohamed, C. Ponce de León, and F. C. Walsh, *J. Power Sources*, 2017, **360**, 243-283;
- 9 A. Falsafi and H. Nejat Pishkenari, A. Falsafi and H. Nejat Pishkenari, *The Journal of Physical Chemistry C*, 2016, **120**, 26259-26269;
